# Supplementary material
Source: Springer Nature journal article supplement (https://www.springermedizin.de/resource/supplementary/13256_2013_2726_MOESM2_ESM.pdf/9651274)

**A**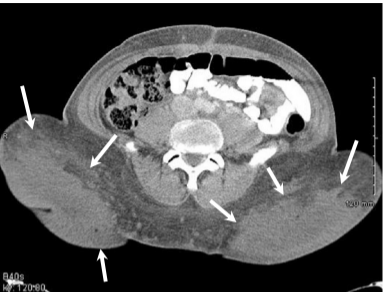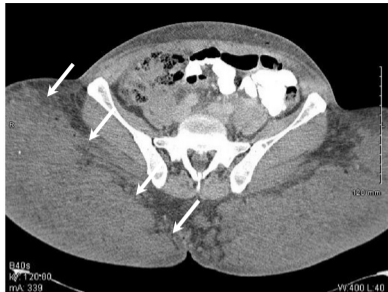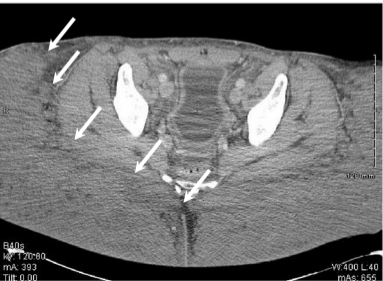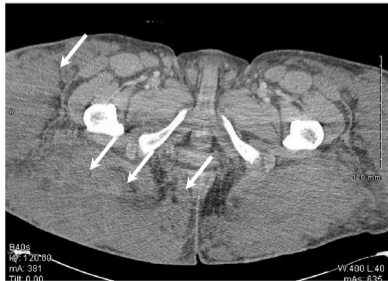**B****PRE-TREATMENT**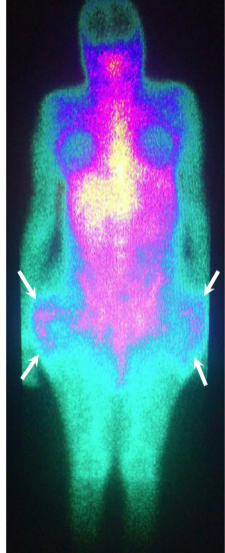**POST-TREATMENT**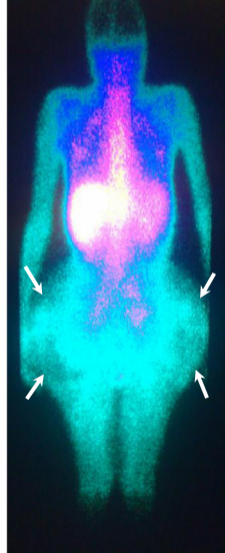

Supplement: MOESM2 [file 9651274]
